# Supplementary material
Source: PubMed Central journal article supplement (PMC6602533)
Supplement: NIHMS1018511-supplement-S1.pdf [file NIHMS1018511-supplement-S1.pdf]

**Supplemental Information**

**Macrophage-Released Pyrimidines**

**Inhibit Gemcitabine Therapy**

**in Pancreatic Cancer**

**Christopher J. Halbrook, Corbin Pontious, Ilya Kovalenko, Laura Lapienyte, Stephan Dreyer, Ho-Joon Lee, Galloway Thurston, Yaqing Zhang, Jenny Lazarus, Peter Sajjakulnukit, Hanna S. Hong, Daniel M. Kremer, Barbara S. Nelson, Samantha Kemp, Li Zhang, David Chang, Andrew Biankin, Jiaqi Shi, Timothy L. Frankel, Howard C. Crawford, Jennifer P. Morton, Marina Pasca di Magliano, and Costas A. Lyssiotis**

A.

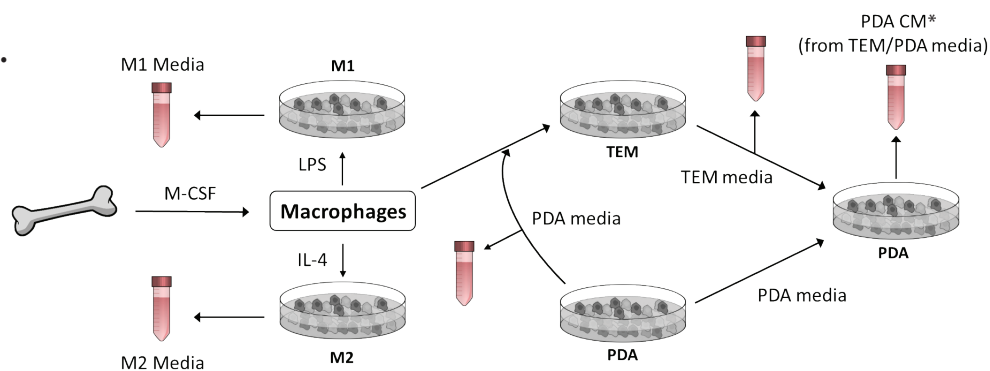

B.

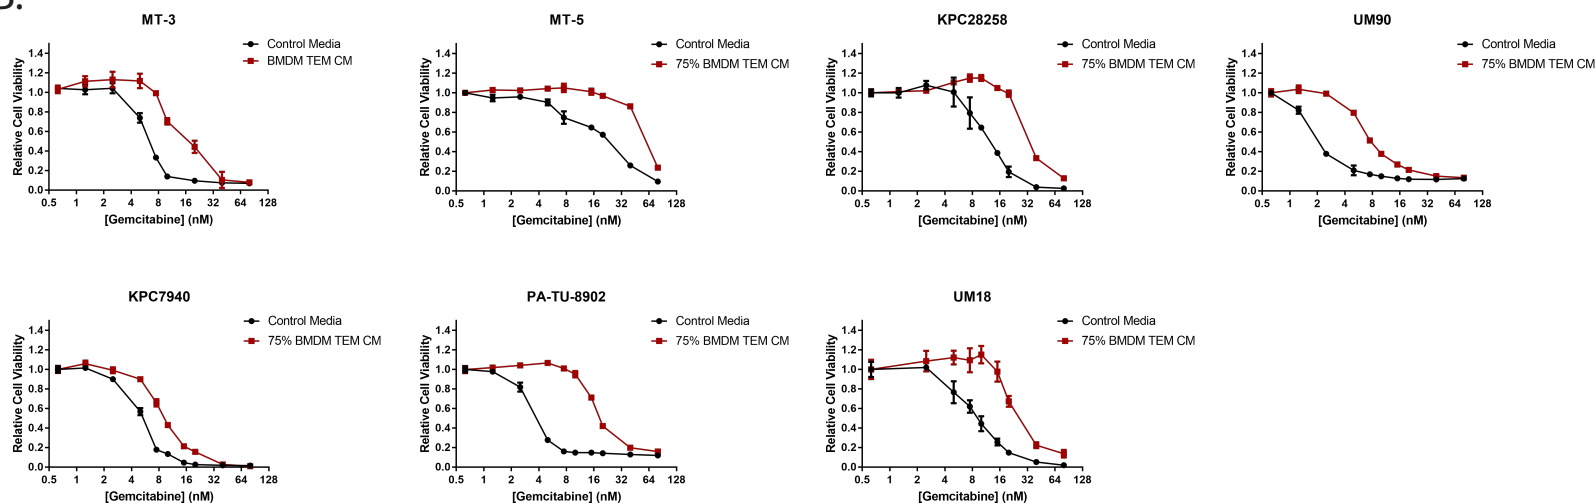

C.

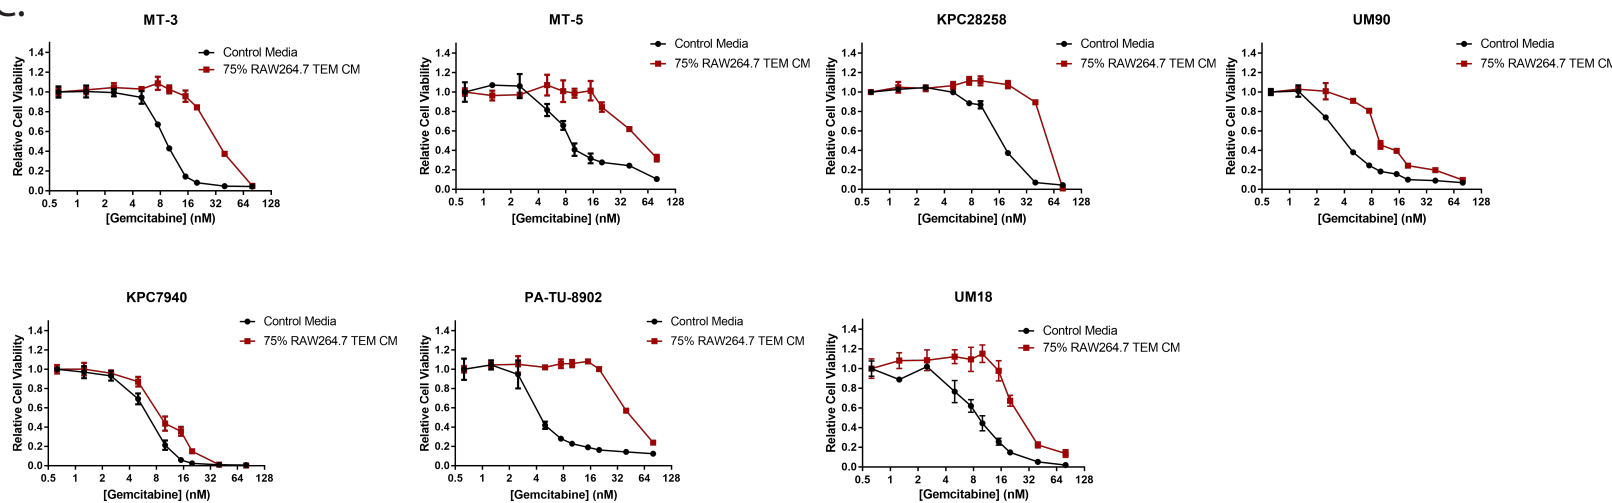

D.

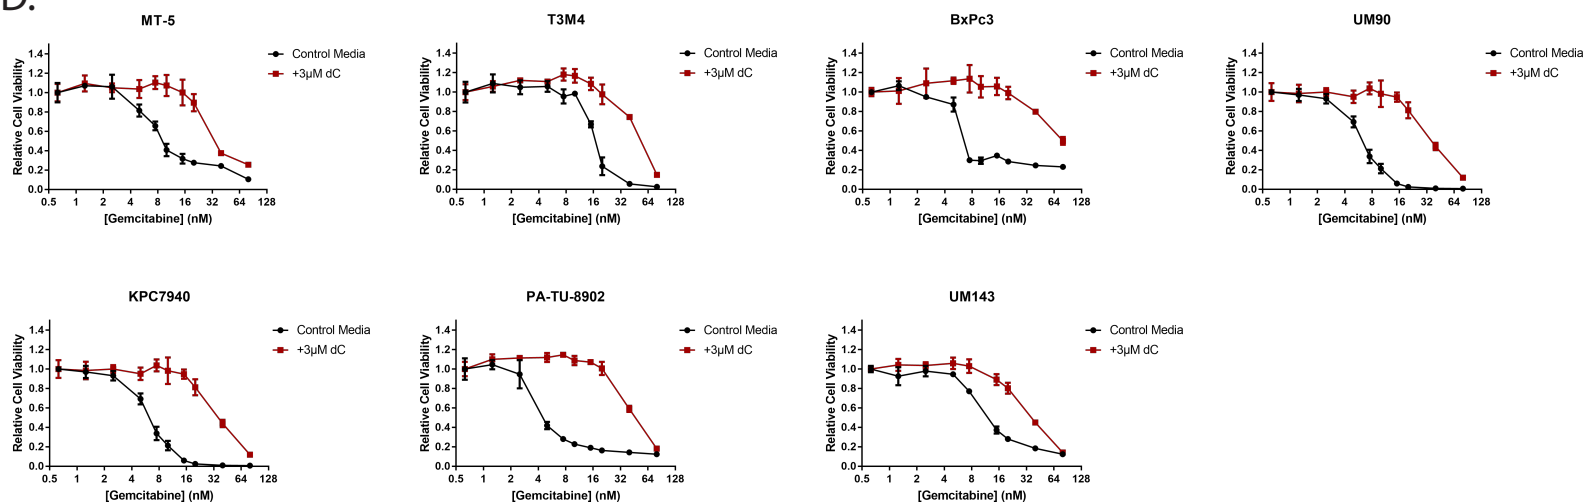

**Supplemental Figure 1**, Related to Figure 1: *TEMs provide gemcitabine resistance across a panel of PDA cell lines*. **S1a**. Schematic of bone marrow derived macrophage (BMDM) differentiation and polarization paradigm. **S1b**. Representative relative viability gemcitabine dose response curves in the presence of 75% BMDM TEM conditioned media vs. control media. Error bars are s.d., each point a technical replicate (n=3). IC<sub>50</sub> values derived from these dose response curves are plotted in **Fig. 1e**. **S1c**. Representative relative viability gemcitabine dose response curves in the presence of 75% RAW 264.7 (RAW) TEM conditioned media vs. control media. Error bars are s.d., each point a technical replicate (n=3). IC<sub>50</sub> values derived from these dose response curves are plotted in **Fig. 1f**. **S1d**. Representative relative viability gemcitabine dose response curves in the presence of complete DMEM supplemented with 3μM deoxycytidine (dC) vs. normal complete DMEM. Error bars are mean ± s.d., each point a technical replicate (n=3). IC<sub>50</sub> values derived from these dose response curves were plotted in **Fig. 1m**.

A.

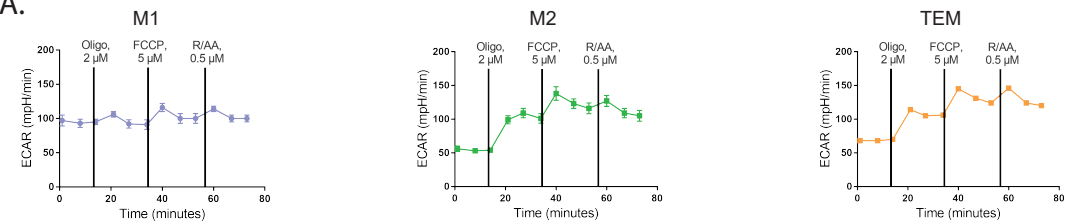

B.

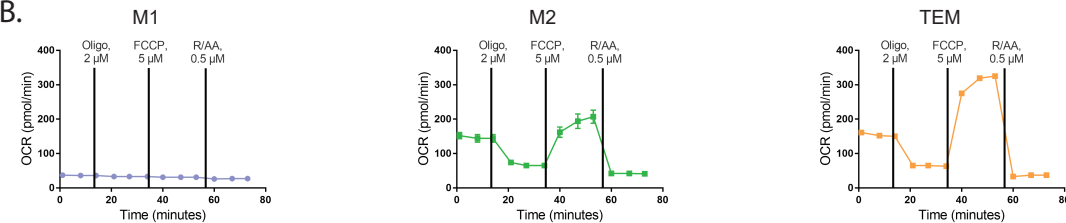

C.

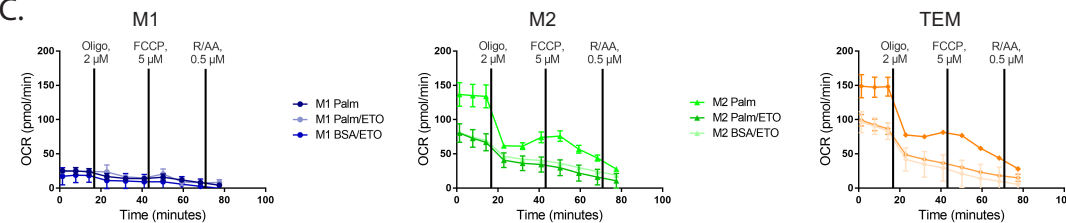

D.

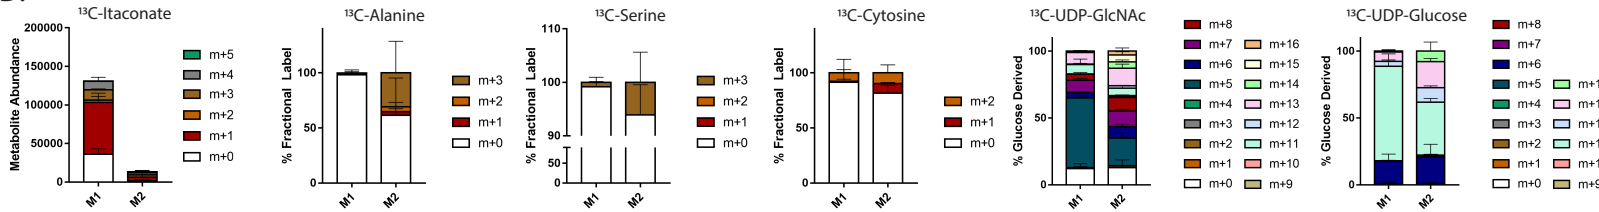

E.

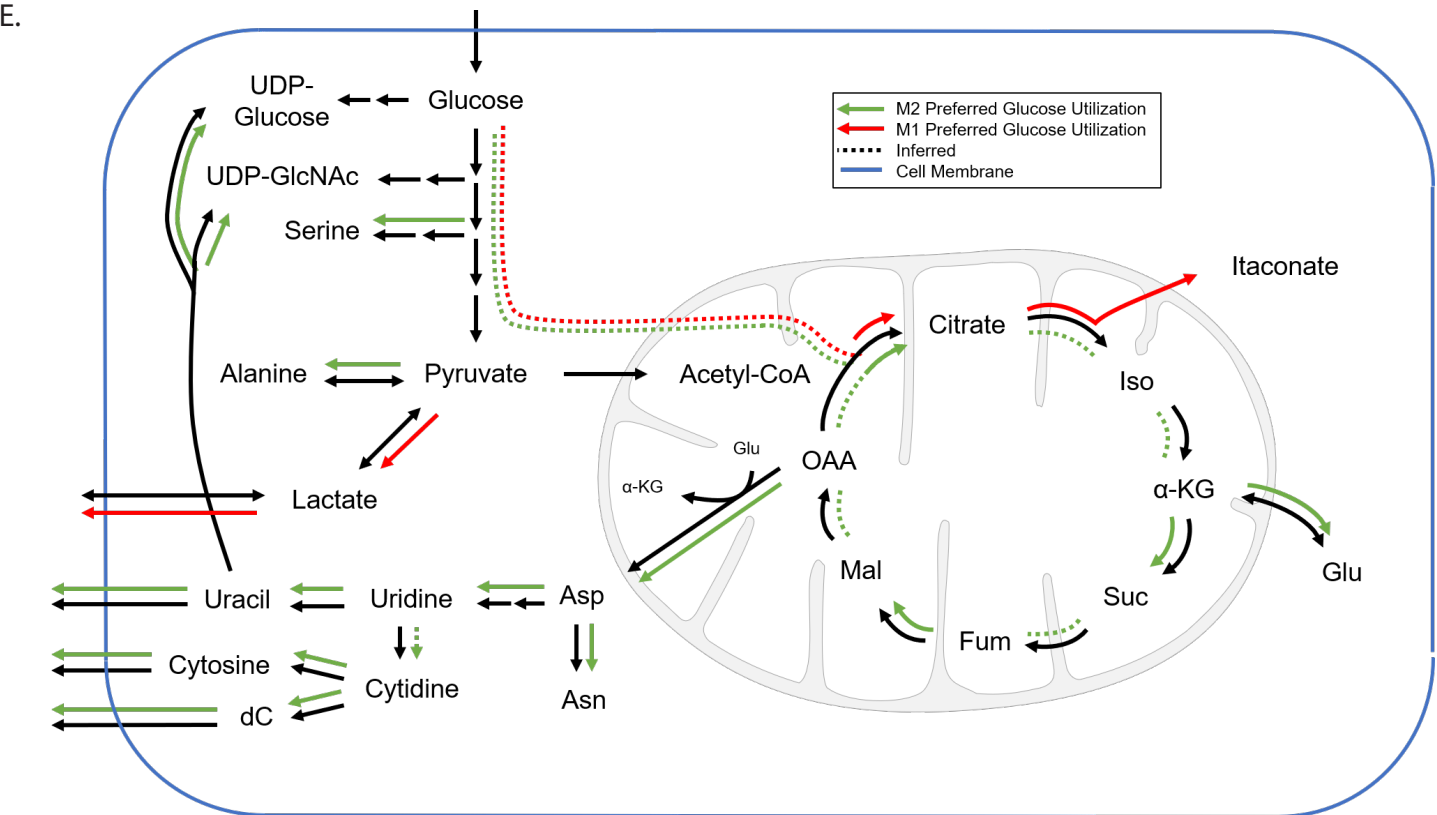

**Supplemental Figure 2**, Related to Figure 2: *Metabolic properties of macrophage subtypes*.

**S2a,b.** Seahorse mitostress assay of TEM, M1 and M2 macrophages measuring **S2a**. ECAR and **S2b**. OCR under standard conditions. Basal ECAR and OCR data were plotted in the bar graphs in **Fig.2b,c** and the Energy Profile in **Fig.2d**. Error bars are s.d., each point a technical replicate (n=5). **S2c.** Seahorse mitostress assay of TEM, M1 and M2 macrophages in fatty acid oxidation assay media supplemented with either Palmitate (Palm) as carbon source, Palm + fatty acid oxidation (FAO) inhibitor etomoxir (ETO), or bovine serum albumin (BSA) + ETO. Basal exogenous FAO data were plotted in the bar graph in **Fig.2e**. Error bars are s.d., each point a technical replicate (n=5). **S2d.** Isotopologue abundance of itaconate and fractional isotopologue labeling from  $^{13}\text{C}$ -glucose in M1 vs. M2 macrophages. Error bars represent s.d. of biological replicates (n=3). **S2e.** Schematic summary of metabolic tracing data from uniformly labeled  $^{13}\text{C}$ -glucose in M1 vs. M2 macrophages. Black lines represent canonical glucose metabolism pathways. The red arrows represent metabolic pathway activity inferred from the tracing data in which M1 metabolic activity is greater than that of M2s; green arrows are used for metabolic pathways in which activity in M2s are dominant over that in M1s. The dashed lines indicate inferred pathway directionality based on labeling patterns. Acetyl-CoA, Acetyl coenzyme A;  $\alpha$ -KG, alpha ketoglutarate; Asn, Asparagine; Asp, Aspartate; dC, deoxycytidine; Fum, Fumarate; Glu, Glutamate; Iso, isocitrate; Mal, Malate; OAA, Oxaloacetate; Suc, Succinate; UDP-GlcNAc, Uridine diphosphate N-acetyl-glucosamine; UDP-Glucose, Uridine diphosphate glucose.

A.

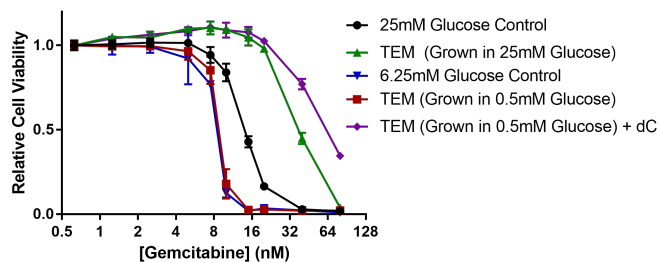

B.

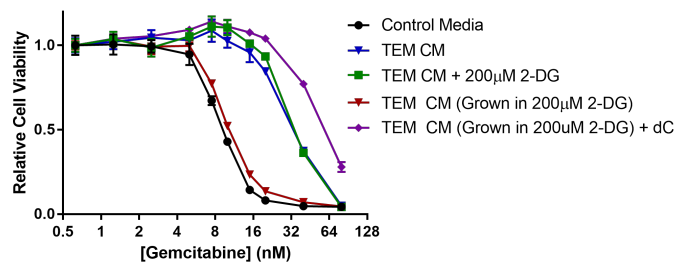

C.

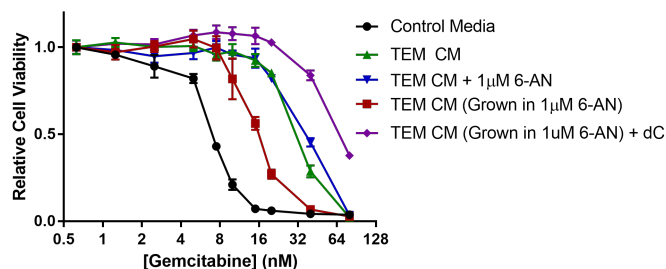

D.

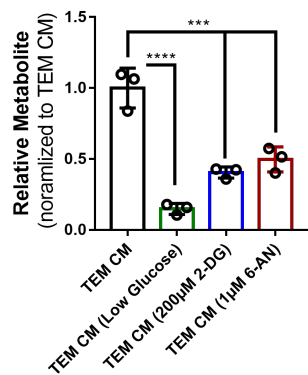

E.

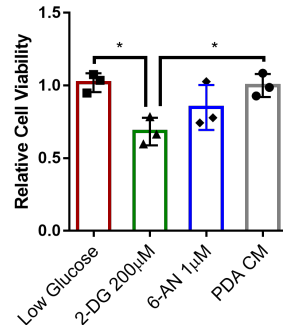

F.

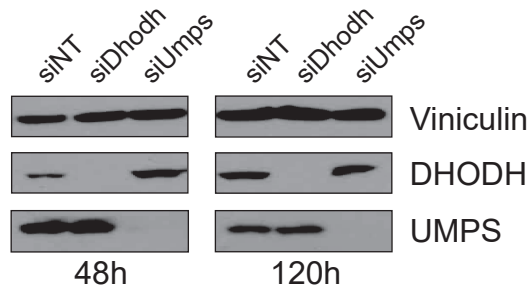

G.

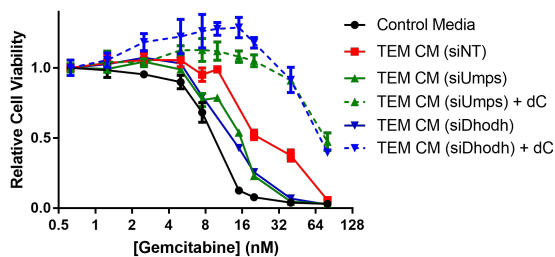

H.

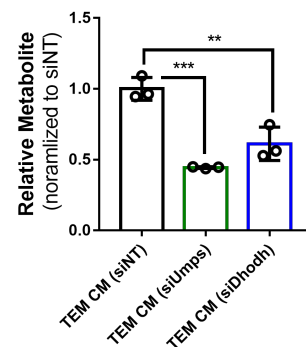

I.

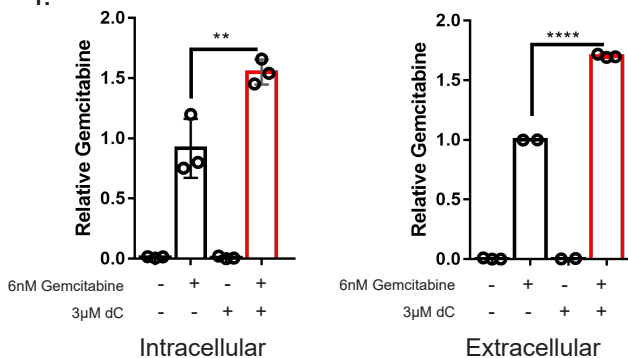

J.

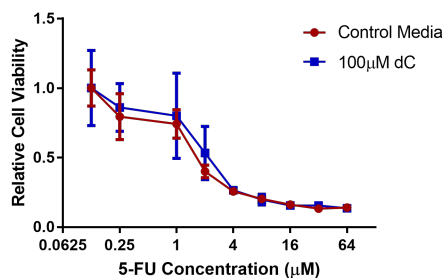

K.

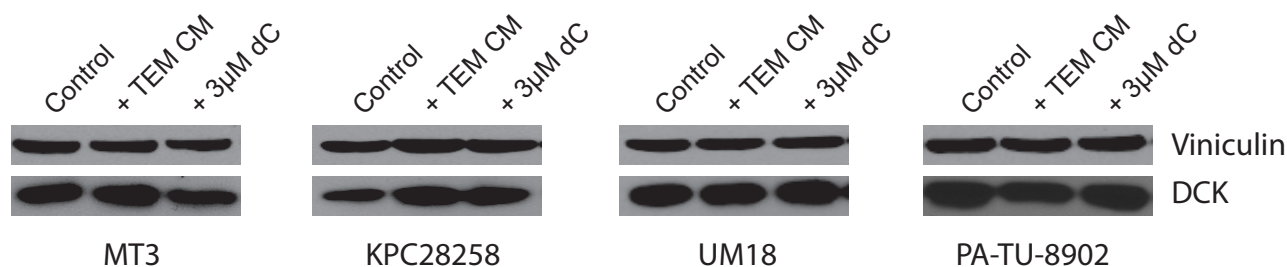

**Supplemental Figure 3**, Related to Figure 2,3: *Inhibition of de novo nucleotide biosynthesis blocks TEM mediated gemcitabine resistance*. **S3a**. Representative relative survival gemcitabine dose response curves for KPC-MT3 cells treated in normal glucose DMEM (25mM), 75% glucose restricted media (6.25mM), 75% conditioned media from TEMs grown in normal glucose DMEM, 75% conditioned media from TEMs grown in glucose restricted media, or 75% CM from TEMs grown in glucose restricted media + 3 $\mu$ M deoxycytidine (dC). Error bars are s.d., each point a technical replicate (n=3). IC<sub>50</sub> values derived from these dose response curves are plotted in **Fig. 2l**. **S3b**. Representative relative survival gemcitabine dose response curves for KPC-MT3 cells treated in normal DMEM, normal DMEM + 200 $\mu$ M 2-deoxyglucose (2-DG), 75% TEM conditioned media, 75% conditioned media from TEMs grown in 200 $\mu$ M 2-DG, or 75% conditioned media from TEMs grown in 200 $\mu$ M 2-DG + 3 $\mu$ M dC. Error bars are s.d., each point a technical replicate (n=3). IC<sub>50</sub> values derived from these dose response curves are plotted in **Fig. 2m**. **S3c**. Representative relative survival gemcitabine curves for KPC-MT3 cells treated in normal DMEM, normal DMEM + 1 $\mu$ M 6-aminonicotinamide (6-AN), 75% TEM conditioned media, 75% conditioned media from TEMs grown in 1 $\mu$ M 6-AN, or 75% conditioned media from TEMs grown in 1 $\mu$ M 6-AN + 3 $\mu$ M dC. Error bars are s.d., each point a technical replicate (n=3). IC<sub>50</sub> values derived from these dose response curves are plotted in **Fig. 2n**. **S3d**. Relative levels of dC present in normal TEM conditioned media, glucose deprived TEM conditioned media, TEM conditioned media grown in 200 $\mu$ M 2-DG, or TEM conditioned media grown in 1 $\mu$ M 6-AN (n=3), as determined by LC/MS analysis, normalized to normal TEM media. **S3e**. Relative viability of TEMs in PDA conditioned media alone, PDA conditioned media + 200 $\mu$ M 2-DG, or PDA conditioned media + 1 $\mu$ M 6-AN. Error bars are s.d., each point a technical replicate (n=3). **S3f**. Western blot analysis of gene knockdown of RAW 246.7 TEMs transfected with either nontarget siRNA, or siRNAs targeted to *Dhodh* or *Umps*. **S3g**. Representative relative survival gemcitabine dose response curves for KPC-MT3 cells treated in normal DMEM, or 75% conditioned media from TEMs transfected with siRNA targeting *Dhodh*, *Umps*, or

nontargeting (NT) siRNA, or conditioned media from TEMs transfected with siRNA targeting *Dhodh*, *Umps* + 3 $\mu$ M dC. Error bars are s.d., each point a technical replicate (n=3). IC<sub>50</sub> values derived from these dose response curves are plotted in **Fig. 2o. S3h**. Relative levels of dC present in siNT TEM conditioned media, siUmps TEM conditioned media, or siDhodh TEM conditioned media (n=3), as determined by LC/MS analysis, normalized to siNT TEM conditioned media. **S3i**. Relative intra and extracellular abundance of gemcitabine in KPC-28258 cells or extracellular media, respectively, after 16 hours of treatment with 6nM gemcitabine in the presence or absence of 3 $\mu$ M dC, as measured by LC-MS/MS. Error bars represent s.d., samples were prepared from individual plates (n=3). **S3j**. Representative relative viability dose response curve of MT3-KPC cells treated with 5-FU in the presence of 100 $\mu$ M dC versus control media. Error bars represent s.d., each point represents a technical replicate (n=3). **S3k**. Western blot analysis of DCK expression in KPC-MT3, KPC 28258, UM18, and PA-TU-8902 PDA cells in normal control media, treated with TEM CM for 24 hours, or treated with 3 $\mu$ M dC for 24 hours. Vinculin serves as a loading control. Significance was calculated by one-way ANOVA with Tukey post hoc test, \*\*  $P \leq 0.01$ ; \*\*\*\*  $P \leq 0.0001$ .

A.

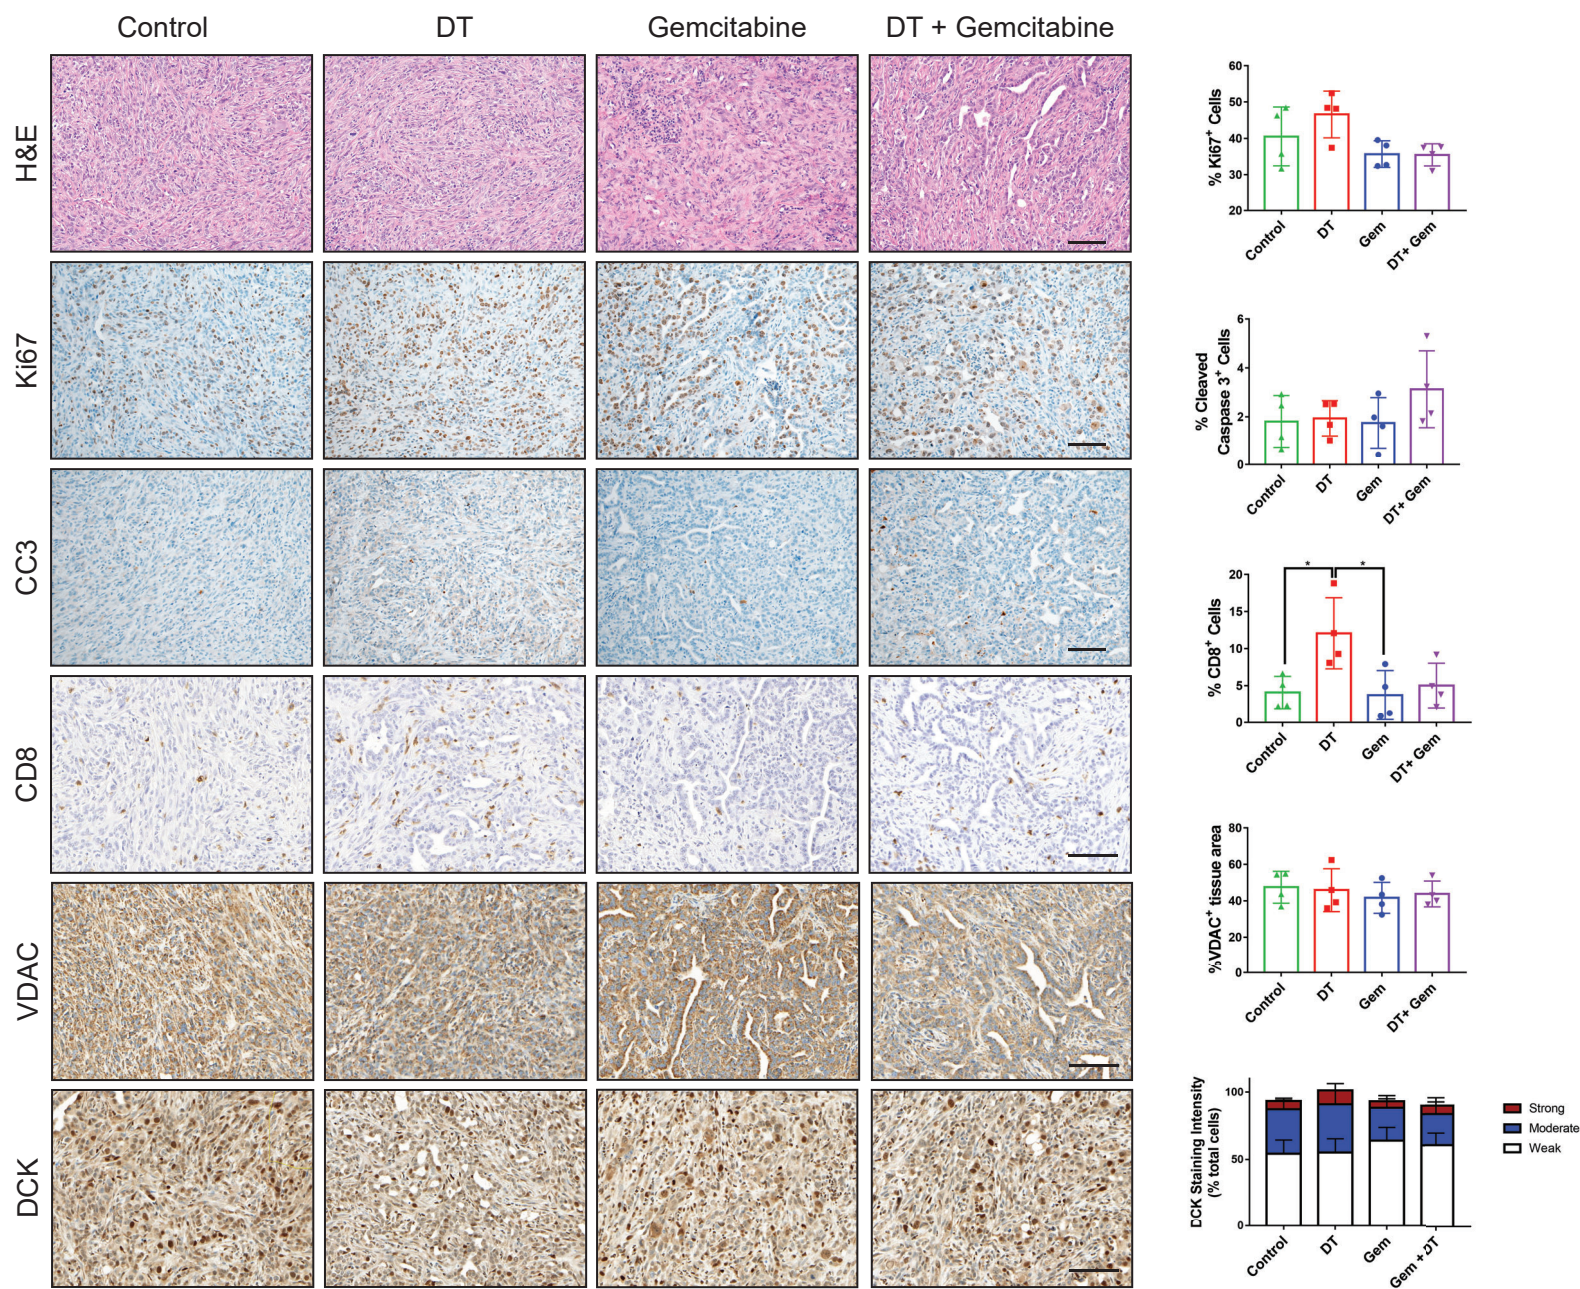

B.

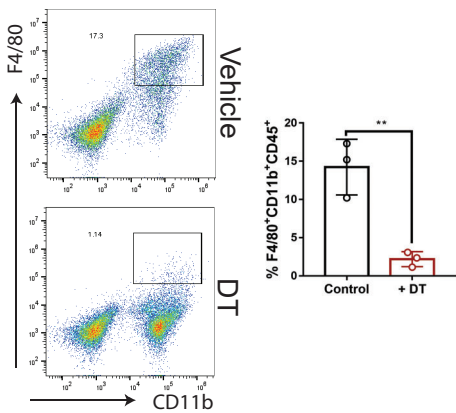

C.

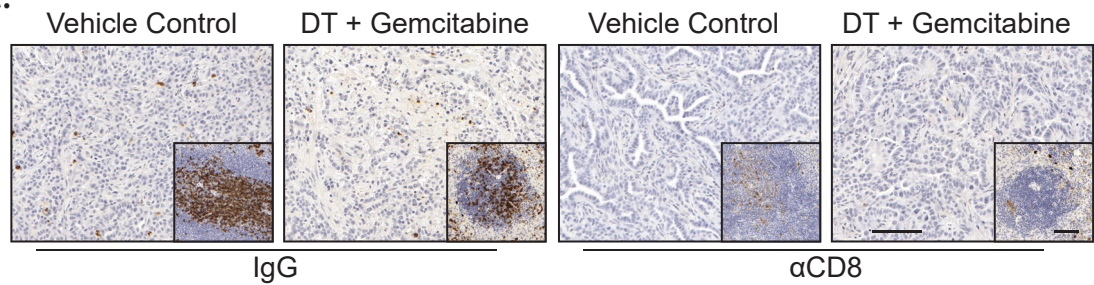

D.

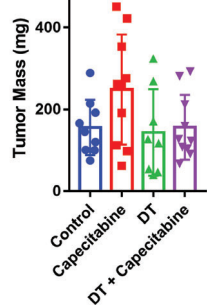

E.

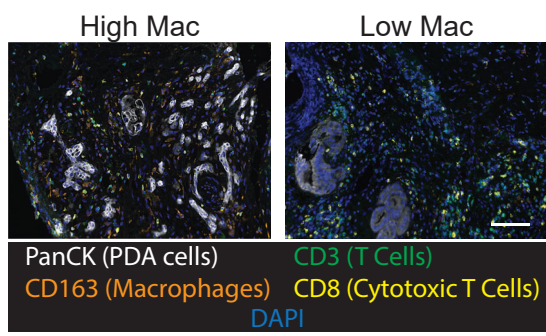

F.

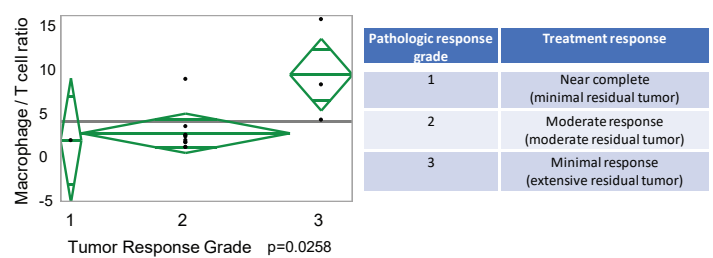

**Supplemental Figure 4**, Related to Figure 4: *Murine and human data for chemotherapy-treated pancreatic tumors*. **S4a**. Histology and quantification of KPC-MT3 tumors from vehicle-, gemcitabine-, diphtheria toxin (DT)-, or gemcitabine + DT-treated Cd11b-DTR mice. CC3, cleaved caspase 3; H&E, Hematoxylin and Eosin. **S4b**. Density plot and quantification from flow cytometry analysis of macrophages (CD45<sup>+</sup>Cd11b<sup>+</sup>F4/80<sup>+</sup>) present in tumor of vehicle or diphtheria toxin (DT) treated mice 24 hours post treatment. **S4c**. Representative immunostaining of CD8 cells present in tumors quantified in **Fig. 4f** (inset: representative staining of CD8 cells in the spleen of the same mouse). **S4d**. Mass of KPC-MT3 tumors at endpoint from vehicle- (n=9), capecitabine- (n=10), DT- (n=8), or DT + capecitabine-treated (n=10) mice. Error bars represent s.d. **S4e**. Representative multiplex-immunofluorescence images of high vs. low macrophage containing neoadjuvant gemcitabine treated patient tumors. **S4f**. Correlation of pathological response, graded using the College of American Pathologists (CAP) tumor regression grading system, to the ratio of macrophages to T cells in neoadjuvant gemcitabine treated patient tumors (n=12). Scale bars = 100µm.

| Species       | Concentration (μM) | SD   |
|---------------|--------------------|------|
| Thymine       | 3.56               | 0.85 |
| Thymidine     | 4.60               | 1.97 |
| Uridine       | 17.25              | 5.37 |
| Deoxyuridine  | 2.62               | 0.63 |
| Cytosine      | 1.65               | 1.33 |
| Cytidine      | 2.71               | 0.94 |
| Deoxycytidine | 3.16               | 0.95 |

**Supplemental Table 1**, Related to Figure 1: Calculated abundance of pyrimidines in TEM conditioned media, determined via LC-MS/MS from 3 separate TEM preparations. SD = standard deviation.

|                                                     | Total | Expected | Hits | Raw p      | LOG(p) | Holm adjust | FDR        | Impact  |
|-----------------------------------------------------|-------|----------|------|------------|--------|-------------|------------|---------|
| Purine metabolism                                   | 68    | 5.3747   | 18   | 1.74E-06   | 13.26  | 0.00014297  | 0.00014297 | 0.34839 |
| Arginine and proline metabolism                     | 44    | 3.4778   | 13   | 1.52E-05   | 11.095 | 0.0012301   | 0.00062266 | 0.47887 |
| Pyrimidine metabolism                               | 41    | 3.2406   | 12   | 3.70E-05   | 10.204 | 0.0029623   | 0.00090521 | 0.34699 |
| Aminoacyl-tRNA biosynthesis                         | 69    | 5.4538   | 16   | 4.42E-05   | 10.028 | 0.0034884   | 0.00090521 | 0       |
| Alanine, aspartate and glutamate metabolism         | 24    | 1.897    | 8    | 0.00029952 | 8.1133 | 0.023363    | 0.0049122  | 0.81118 |
| Vitamin B6 metabolism                               | 9     | 0.71136  | 4    | 0.0034174  | 5.6789 | 0.26314     | 0.046705   | 0.41176 |
| beta-Alanine metabolism                             | 17    | 1.3437   | 5    | 0.0080792  | 4.8185 | 0.61402     | 0.087446   | 0.44444 |
| Glycine, serine and threonine metabolism            | 31    | 2.4502   | 7    | 0.0085313  | 4.764  | 0.63985     | 0.087446   | 0.39196 |
| Glutathione metabolism                              | 26    | 2.055    | 6    | 0.013245   | 4.3241 | 0.98013     | 0.12068    | 0.08683 |
| Nitrogen metabolism                                 | 9     | 0.71136  | 3    | 0.028398   | 3.5614 | 1           | 0.23286    | 0       |
| Phenylalanine, tyrosine and tryptophan biosynthesis | 4     | 0.31616  | 2    | 0.033434   | 3.3982 | 1           | 0.24923    | 0.5     |
| Glyoxylate and dicarboxylate metabolism             | 18    | 1.4227   | 4    | 0.047618   | 3.0445 | 1           | 0.28903    | 0.51612 |
| Valine, leucine and isoleucine biosynthesis         | 11    | 0.86944  | 3    | 0.049665   | 3.0024 | 1           | 0.28903    | 0.99999 |
| Biotin metabolism                                   | 5     | 0.3952   | 2    | 0.052872   | 2.9399 | 1           | 0.28903    | 0.4     |
| D-Glutamine and D-glutamate metabolism              | 5     | 0.3952   | 2    | 0.052872   | 2.9399 | 1           | 0.28903    | 1       |
| Amino sugar and nucleotide sugar metabolism         | 37    | 2.9245   | 6    | 0.065696   | 2.7227 | 1           | 0.32204    | 0.18595 |
| Citrate cycle (TCA cycle)                           | 20    | 1.5808   | 4    | 0.066765   | 2.7066 | 1           | 0.32204    | 0.24707 |
| Histidine metabolism                                | 15    | 1.1856   | 3    | 0.10889    | 2.2174 | 1           | 0.46995    | 0       |
| Pantothenate and CoA biosynthesis                   | 15    | 1.1856   | 3    | 0.10889    | 2.2174 | 1           | 0.46995    | 0       |
| Taurine and hypotaurine metabolism                  | 8     | 0.63232  | 2    | 0.12673    | 2.0657 | 1           | 0.5196     | 0.71428 |
| Glycolysis or Gluconeogenesis                       | 26    | 2.055    | 4    | 0.14371    | 1.94   | 1           | 0.53563    | 0.00653 |
| Galactose metabolism                                | 26    | 2.055    | 4    | 0.14371    | 1.94   | 1           | 0.53563    | 0.21695 |
| Cysteine and methionine metabolism                  | 27    | 2.1341   | 4    | 0.15898    | 1.839  | 1           | 0.5668     | 0.17491 |
| Glycerophospholipid metabolism                      | 30    | 2.3712   | 4    | 0.20804    | 1.57   | 1           | 0.67432    | 0.15278 |
| Riboflavin metabolism                               | 11    | 0.86944  | 2    | 0.21381    | 1.5427 | 1           | 0.67432    | 0       |

|                                            |    |         |   |         |          |   |         |         |
|--------------------------------------------|----|---------|---|---------|----------|---|---------|---------|
| Phenylalanine metabolism                   | 11 | 0.86944 | 2 | 0.21381 | 1.5427   | 1 | 0.67432 | 0.64815 |
| Nicotinate and nicotinamide metabolism     | 13 | 1.0275  | 2 | 0.27449 | 1.2928   | 1 | 0.82256 | 0.20833 |
| Lysine biosynthesis                        | 4  | 0.31616 | 1 | 0.28087 | 1.2698   | 1 | 0.82256 | 0       |
| Pentose and glucuronate interconversions   | 16 | 1.2646  | 2 | 0.3648  | 1.0084   | 1 | 1       | 0.2     |
| Cyanoamino acid metabolism                 | 6  | 0.47424 | 1 | 0.3904  | 0.9406   | 1 | 1       | 0       |
| Tryptophan metabolism                      | 40 | 3.1616  | 4 | 0.39058 | 0.94011  | 1 | 1       | 0.37356 |
| Starch and sucrose metabolism              | 19 | 1.5018  | 2 | 0.45065 | 0.79705  | 1 | 1       | 0.31549 |
| Ascorbate and aldarate metabolism          | 9  | 0.71136 | 1 | 0.52443 | 0.64544  | 1 | 1       | 0       |
| Methane metabolism                         | 9  | 0.71136 | 1 | 0.52443 | 0.64544  | 1 | 1       | 0       |
| Butanoate metabolism                       | 22 | 1.7389  | 2 | 0.52969 | 0.63547  | 1 | 1       | 0.02899 |
| Lysine degradation                         | 23 | 1.8179  | 2 | 0.55429 | 0.59007  | 1 | 1       | 0       |
| Pyruvate metabolism                        | 23 | 1.8179  | 2 | 0.55429 | 0.59007  | 1 | 1       | 0.01375 |
| Valine, leucine and isoleucine degradation | 38 | 3.0035  | 3 | 0.5898  | 0.52797  | 1 | 1       | 0       |
| Porphyrin and chlorophyll metabolism       | 27 | 2.1341  | 2 | 0.64351 | 0.44081  | 1 | 1       | 0       |
| Selenoamino acid metabolism                | 15 | 1.1856  | 1 | 0.71105 | 0.34102  | 1 | 1       | 0       |
| Glycerolipid metabolism                    | 18 | 1.4227  | 1 | 0.77495 | 0.25495  | 1 | 1       | 0.0256  |
| Pentose phosphate pathway                  | 19 | 1.5018  | 1 | 0.79297 | 0.23197  | 1 | 1       | 0.03078 |
| Propanoate metabolism                      | 20 | 1.5808  | 1 | 0.80956 | 0.21127  | 1 | 1       | 0       |
| Fructose and mannose metabolism            | 21 | 1.6598  | 1 | 0.82482 | 0.19258  | 1 | 1       | 0.03142 |
| Primary bile acid biosynthesis             | 46 | 3.6359  | 2 | 0.8919  | 0.11441  | 1 | 1       | 0.05952 |
| Inositol phosphate metabolism              | 28 | 2.2131  | 1 | 0.90258 | 0.1025   | 1 | 1       | 0       |
| Biosynthesis of unsaturated fatty acids    | 42 | 3.3197  | 1 | 0.97015 | 0.030308 | 1 | 1       | 0       |
| Fatty acid biosynthesis                    | 43 | 3.3987  | 1 | 0.97258 | 0.027804 | 1 | 1       | 0       |

**Supplemental Table 2**, Related to Figure 2: Metaboanalyst pathway enrichment analysis.

| <b>Compound</b>    | <b>Primary<br/>Transporter</b> | <b>Activating<br/>Kinase</b> | <b>Inhibited by<br/>3μM dC</b> |
|--------------------|--------------------------------|------------------------------|--------------------------------|
| Gemcitabine        | CNT>ENT                        | dCK                          | 8 fold                         |
| 5-aza-dC           | ENT~CNT                        | dCK                          | 4 fold                         |
| 5-aza-C            | ENT~CNT                        | UCK                          | 0                              |
| Trifluorothymidine | CNT>ENT                        | TK                           | 0                              |
| Fialuridine        | ENT~CNT                        | TK                           | 0                              |
| 5-FU               | OAT2                           | TYMS                         | 0                              |
| dC                 | ENT>CNT                        | dCK                          | N/A                            |

**Supplemental Table 3**, Related to Figure 3: Table of deoxycytidine and anti-pyrimidine metabolites, their reported transporters, activating kinases, and inhibition by deoxycytidine treatment. 5-aza-dC, 5-aza-dexoycytidine; 5-aza-C, 5-aza-cytidine; 5-FU, 5-fluorouracil; CNT, concentrative nucleoside transporter; dCK = deoxycytidine kinase; ENT, equilibrative nucleoside transporter; OAT2, organic anion transporter 2; TK, thymidine kinase; TYMS, thymidylate synthetase; UCK, uridine-cytidine kinase.

**Supplemental Table 4, Related to Figure 4:** De-identified patient data presented in Fig. 4i,j and detailed in STAR Methods.
